# Supplementary material for: Cannabidiolic acid in Hemp Seed Oil Table Spoon and Beyond
Source: MDPI journal article supplement (doi:10.3390/molecules27082566), 2022-04-15
Supplement: s1 [file s1]

# Cannabidiolic acid in hemp seed oil table spoon and beyond

Ersilia Nigro<sup>1,2,†</sup>, Maria Tommasina Pecoraro<sup>1,†</sup>, Marialuisa Formato<sup>1</sup>, Sara Ragucci<sup>1</sup>, Simona Piccolella<sup>1</sup>, Marta Mallardo<sup>1,2</sup>, Rosita Russo<sup>1</sup>, Antimo Di Maro<sup>1</sup>, Aurora Daniele<sup>2,3,\*</sup> and Severina Pacifico<sup>1,\*</sup>

<sup>1</sup> Dipartimento di Scienze e Tecnologie Ambientali, Biologiche, Farmaceutiche, Università della Campania "Luigi Vanvitelli", 81100, Caserta, Italy.

<sup>2</sup> CEINGE, Biotecnologie Avanzate Scarl, Napoli.

<sup>3</sup> Dipartimento di Medicina Molecolare e Biotecnologie Mediche, "Federico II" Università degli Studi di Napoli, Napoli, 80131, Italy.

\* Correspondence: severina.pacifico@unicampania.it; aurora.daniele@unina.it

† These authors equally contribute to the manuscript

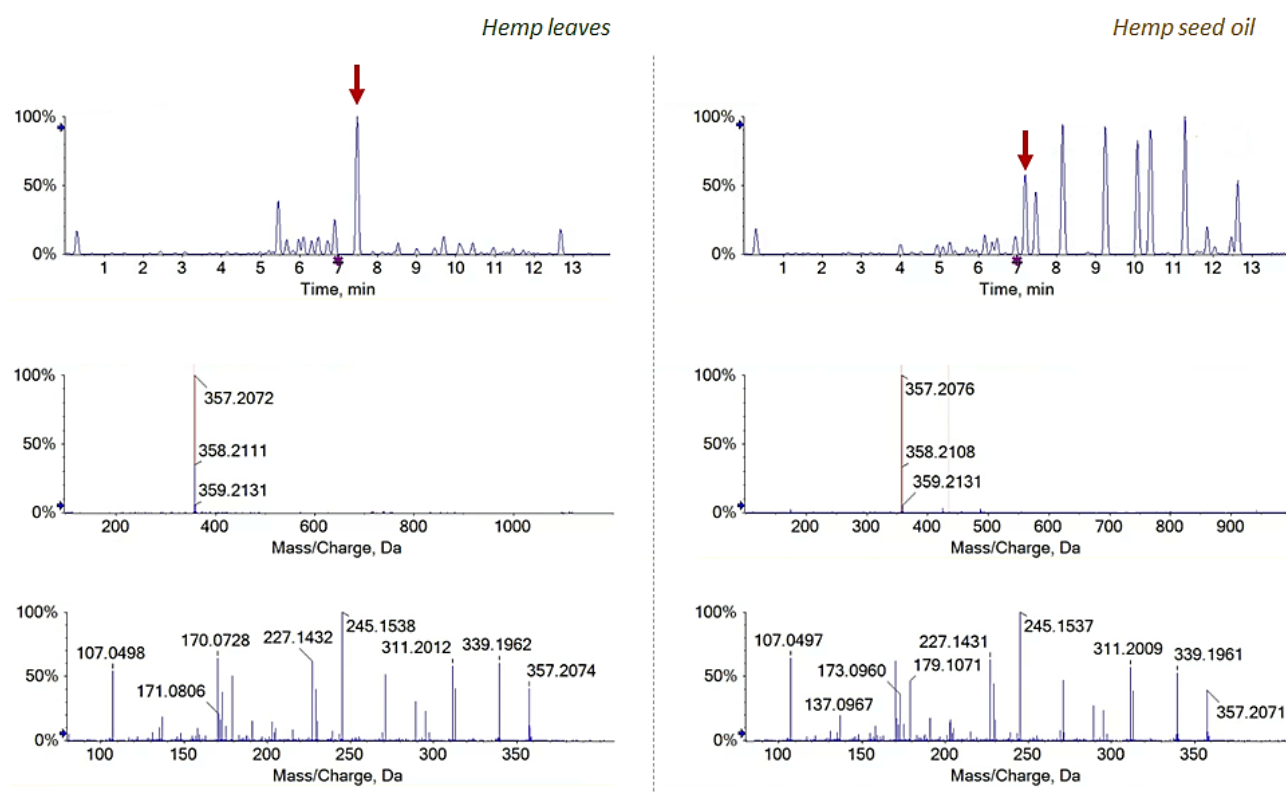

**Figure S1.** TOF-MS and MS/MS spectra of CBDA detected in leaf hemp sample and cold-pressed hemp seed oil. Red arrows highlight the corresponding peaks in the TICs (Total Ion Chromatograms).

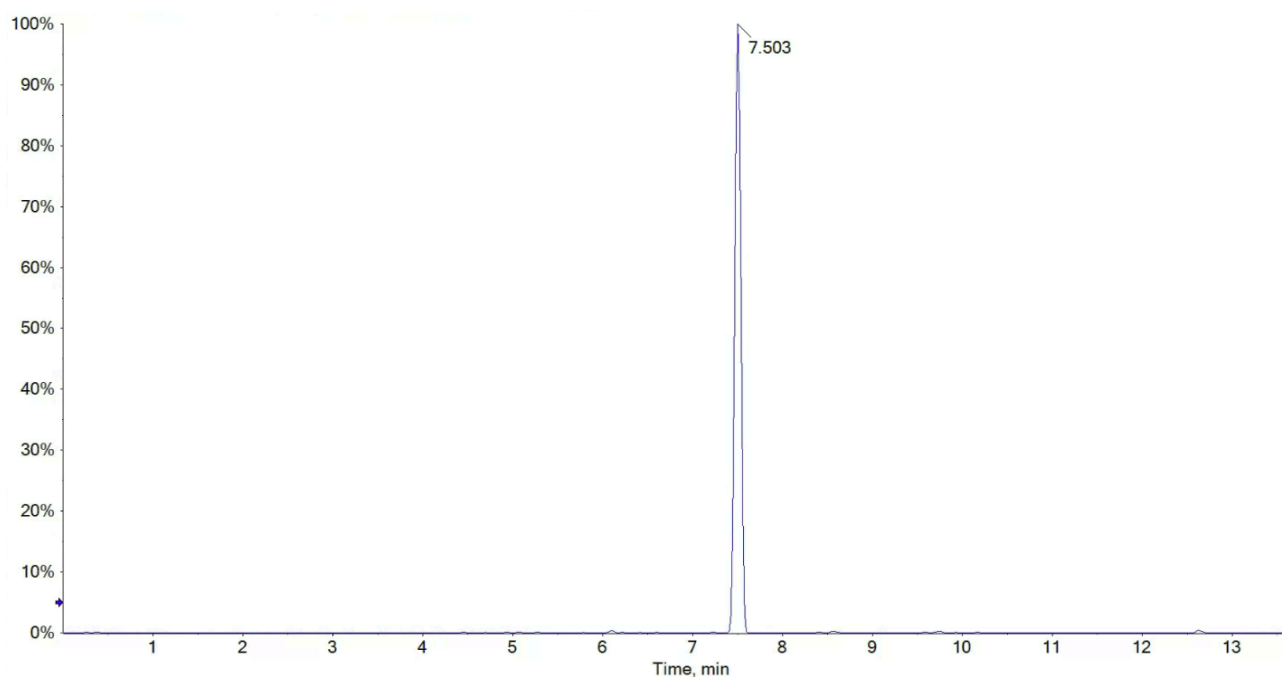

**Figure S2.** UHPLC-TOF-MS chromatogram of purified CBDA, acquired using the same experimental conditions of hemp leaf extract.

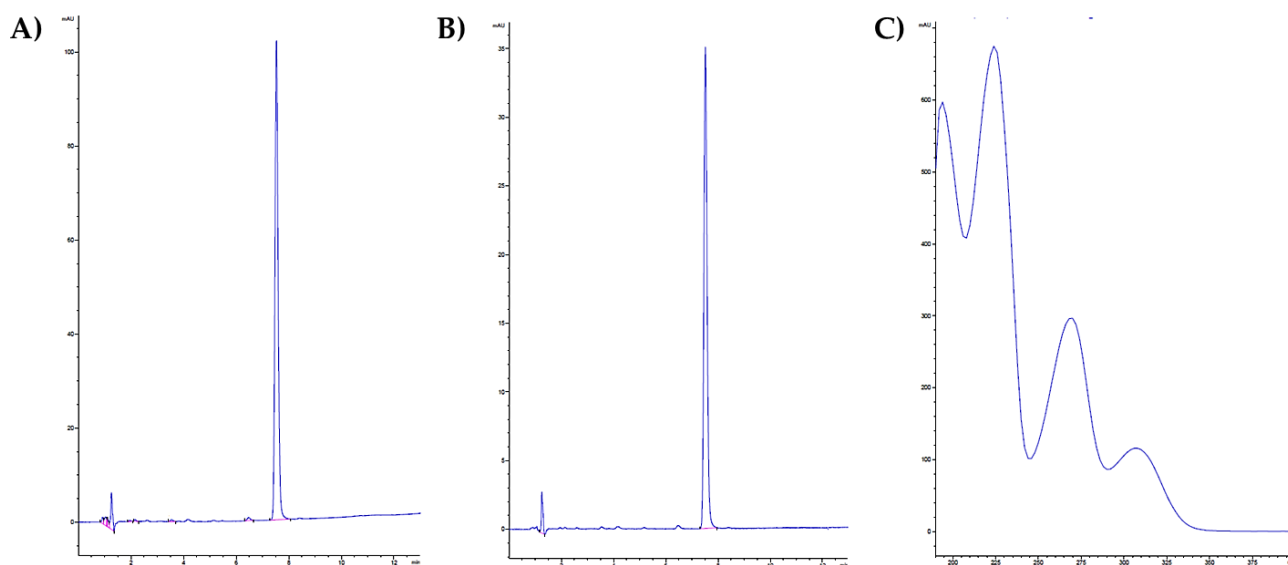

**Figure S3.** A) HPLC-UV chromatogram recorded at  $266\pm 4$  nm; B) HPLC-UV chromatogram recorded at  $306\pm 4$  nm; C) UV spectrum of purified CBDA.
